# Supplementary material for: Effect of Novel Processing Techniques on the Carotenoid Release during the Production of Red Guava Juice
Source: MDPI journal article supplement (doi:10.3390/molecules29020487), 2024-01-18
Supplement: s1 [file s1]

## Supplementary Materials

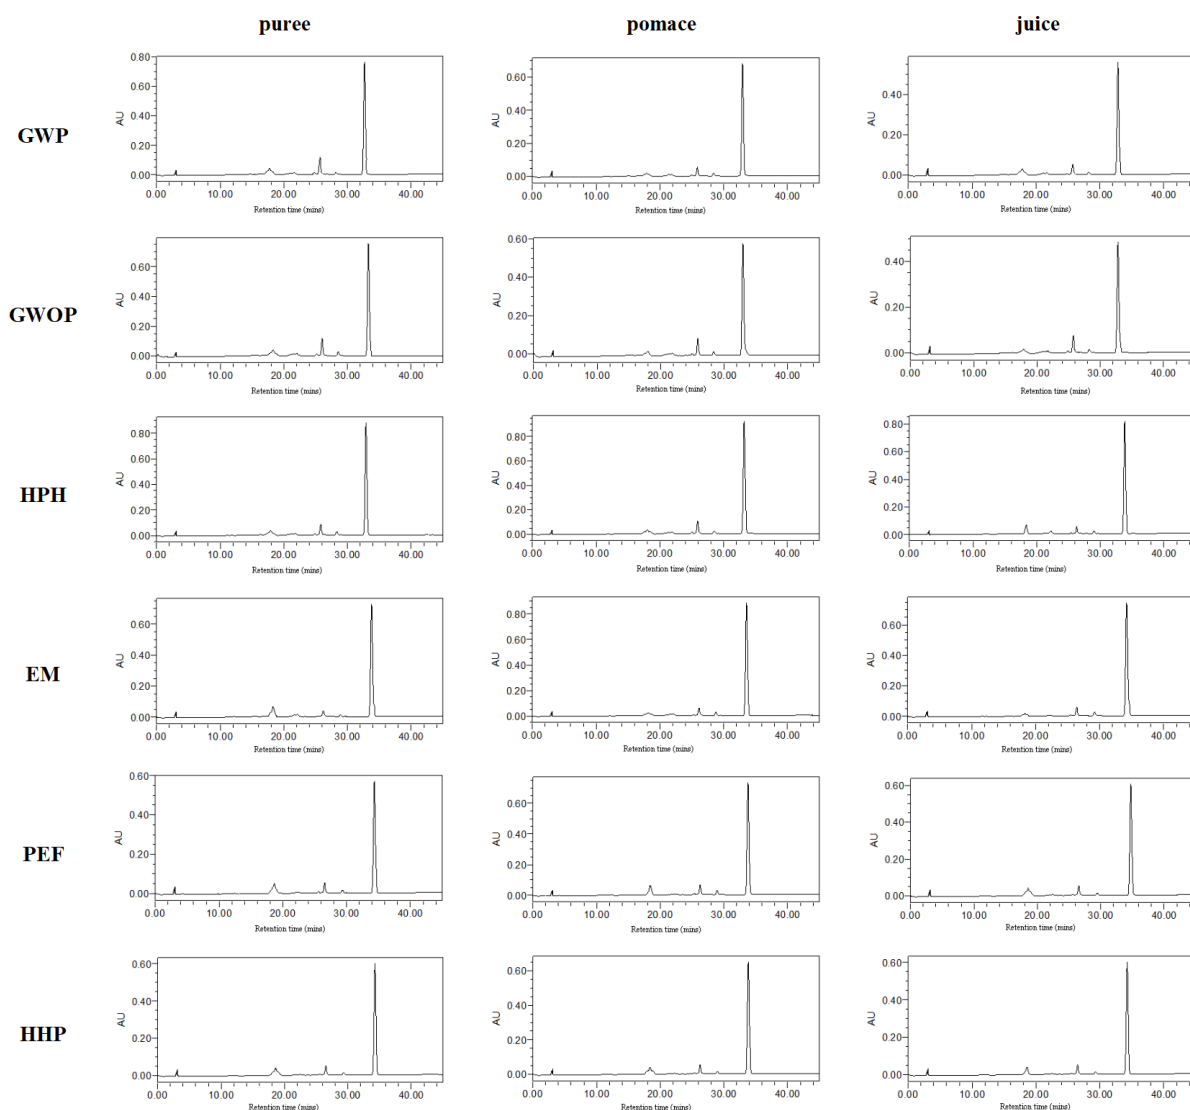

**Figure S1** HPLC-DAD chromatogram of carotenoids detected in the guava samples at 450 nm.

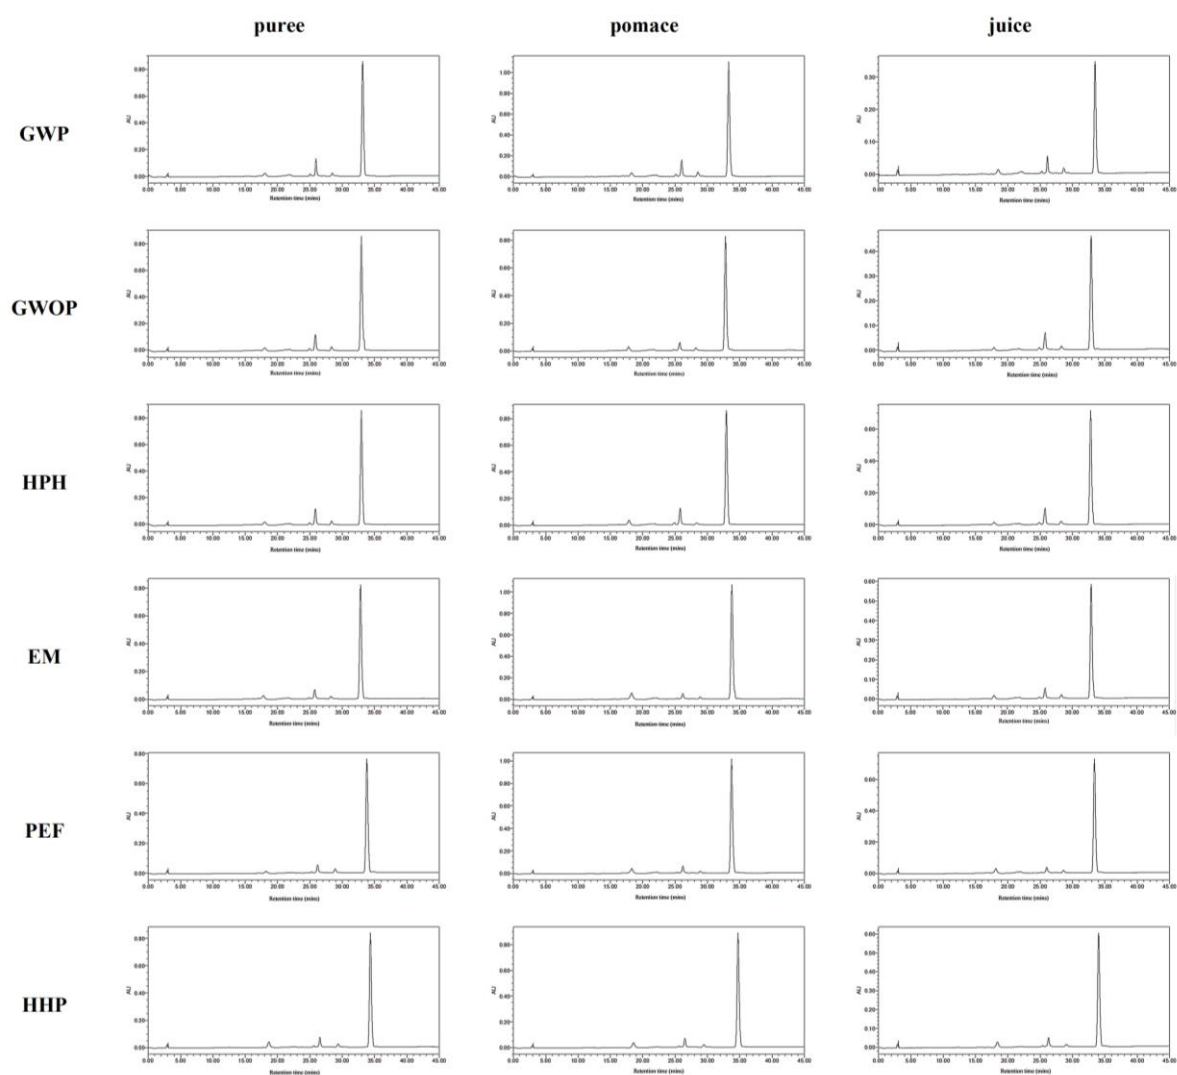

**Figure S2** HPLC-DAD chromatogram of carotenoids detected in the guava samples at 470 nm.
